# Supplementary material
Source: PubMed Central journal article supplement (PMC2587617)
Supplement: 0808893105_0808893105SI.pdf [file 0808893105_0808893105SI.pdf]

# Supporting Information

Lee et al. 10.1073/pnas.0808893105

## SI Materials and Methods

**Microarray Fabrication.** The construction of the cDNA microarray was essentially the same as described previously (1). Randomly selected EST clones from libraries were amplified by PCR using the following primer set: 5'-GTGGATGTTGCCTT-TACTTC-3' and 5'-GTTTCAGGGGGAGGTGTGG-3' for the clones from the full-length-enriched and 5'-end-enriched library; and 5'-GCGTGAATGTAAGCGTGAC-3' and 5'-CAGCCTCTTGCTGAGTG-3' for the clones from the random-primed library. PCR products were purified by ethanol precipitation and resuspended in 50% DMSO. cDNAs were transferred as single spots on glass slides (CMT-GAPS II, Corning) by using the pin array printing system (Cartesian Technologies) and spots were immobilized by baking at 80°C for 2 h. The microarrays also contained probes for 5-HT-regulated (ApC/EBP) as well as consistently expressed genes (e.g., ribosomal protein S4, Hsc70, and actin). cDNAs for GFP and luciferase were spotted as exogenous negative controls.

**In vivo 5-HT treatment to *Aplysia*.** To screen the 5-HT-regulated genes in pleural ganglia, we treated animals *in vivo* with 250  $\mu$ M 5-HT. Two hours after onset of 5-HT treatment, animals were anesthetized and pleural ganglia were dissected for analysis. The same number of control animals which were not exposed to 5-HT were handled and dissected in a manner similar to the treated animals.

**Microarray Hybridization, Scanning, and Analysis.** Pleural ganglia from three *in vivo* 5-HT treated and from the same number of control animals were isolated 2 h after the onset of the 5-HT. To obtain a sufficient amount of RNA for the microarray hybrid-

ization, aRNAs were prepared from 2  $\mu$ g of the total RNA purified from pleural ganglia (RiboAmp RNA amplification kit, Arcturus). Six micrograms of aRNAs were labeled with Cy3 (control group) or Cy5 (5-HT group) by reverse transcription (SuperScript III reverse transcriptase, Invitrogen) and purified using Qiagen PCR purification columns, followed by hybridization to the *Aplysia* cDNA microarray which was prehybridized with 0.1 mg/ml BSA. The slides were then washed, scanned (GenePix 4000B, Axon Instruments), and analyzed using GenePix Pro and Acuity software (Axon Instruments). The results from two independent 5-HT treatments and hybridization analyses were averaged. Only high-quality spots (circularity >80, % saturation <2 for each channel, signal to noise ratio >3 for each channel, Rgn  $R^2(635/532) > 0.6$ ) were used for further analysis. 93% and 88% of spots were found as high quality spots from each microarray, respectively. After filtering out low quality spots, the ratios of medians (5-HT/control) of total 3,813 spots (55% of total spots) which show the expression changes in the same directions were averaged. Correlation coefficient of this replicate was 0.747 (Pearson correlation,  $P < 0.0001$ ).

**Real-Time PCR.** The cDNAs prepared as described above were used for quantitative real-time PCR. Reactions were performed in the Thermal Cycler Dice Real Time System, TP800 (Takara) using SYBR Premix Ex Taq (Takara) and gene specific primer sets [Primer sequences are shown in Table S4]. Amplification reaction consisted of one cycle of 95°C for 5 min, followed by 60 cycles of 95°C for 15 s, 60°C for 15 s, and 72°C for 30 s. Data were collected during the extension phase at 72°C. S4 was used as an internal control. For the relative comparison of each mRNA, we analyzed  $C_T$  value using the  $2^{-\Delta\Delta C_T}$  method (2). Data collected by real-time PCR were analyzed using a student's *t* test.

1. Hegde P, et al. (2000) A concise guide to cDNA microarray analysis. *Biotechniques* 29:548–556.

2. Livak KJ, Schmittgen TD (2001) Analysis of relative gene expression data using real-time quantitative PCR and the 2(-Delta Delta C(T)) Method. *Methods* 25:402–408.

```

aplysia : MAKFDLTTTTCQVLDRLHVPFLLEFLTVKGLYEEKENLLGRLDLDLSDTNHVDFAHDVYKRLNSD-DIPHALREKRTTVVAQLKQLCAETERIVKMFEDPETTRQHC : 106
human   : MAEYDLTRRHAHFLDRHLVFPFLLEFLSVKEIYNEKELLQGLDLDLSDTNHVDFAHDVYKRLNSD-DIPHALREKRTTVVAQLKQLCAETERIVKMFEDPETTRQHC : 105
Zebra   : MAEYDLTRRHAHFLDRHLVFPFLLEFLSVKEIYNEKELLHGLDLDLSDTNHVDFAHDVYKRLNSD-DIPHALREKRTTVVAQLKQLCAETERIVKMFEDPETTRQHC : 106
Drosophila : MANFDLTRINCCFLDRHLVFPFLLEFLCCKEYINQCELLEYILETVNKNTHIDYTHDTRRRLNLSQEMFEEVQRKAQVLAATLKQLQNEVAPIMKAT---DILKNGE : 103
Xenopus : MADYDLTRKIAQFLDRHLVFPFLLEFLSVKEIYNEKELLHGLDLDLSDTNHVDFAHDVYKRLNSD-DIPHALREKRTTVVAQLKQLCAETERIVKMFEDPETTRQHC : 106

aplysia : SSRDGRQLFDYLLSKEYGFHEMINTLYDAKFOYECGNYSATAEYLYFVRVLIFFSDRNFLSSCGKGLASEILKONVDAALDDLNKVKDLIDGNSFASDLDLTLQQR : 212
human   : STRDGRQLFDYLLADKHGFRCEYLDLTYRYAKFOYECGNYSAAAEYLYFVRVLIFFSDRNFLSSCGKGLASEILKONVDAAMEDLTRLKETIDNNSVSSPLQSLQQR : 211
Zebra   : STRDGRQLFDYLLADKHGFRCEYLDLTYRYAKFOYECGNYSAAAEYLYFVRVLIFFSDRNFLSSCGKGLASEILKONVDAAMEDLTRLKETIDNNSVSSPLQSLQQR : 212
Drosophila : SMKDSKTFVVALQKDFYFVVEHLESAYLLAKLYECGNYSQESTSYLYFCLIVHSPDKNYLNVLWGKLAEEILTLNUNTALEDLTRLRQYIDNANFST-IGALQQR : 208
Xenopus : STRDGRQLFDYLLAEKHGFRCEYLDLTYRYAKFOYECGNYSAAAEYLYFVRVLIFFSDRNFLSSCGKGLASEILKONVDAAMEDLTRLKETIDNNSVSSPLQSLQQR : 212

aplysia : TWVIHUSLVVFFNHPKGRDLIDDFLYCFQYLNAIQTHCPHILRYLITAVITNK---QRNRTALKDLVKVIQOESYTYKDPITEFVQCLYVDFDFGACKLRECE : 316
human   : TWLIHUSLVVFFNHPKGRDNIIDDFLYCFQYLNAIQTHCPHILRYLITAVITNKDVRKRQWLKDLVKVIQOESYTYKDPITEFVQCLYVDFDFGACKLRECE : 317
Zebra   : TWLIHUSLVVFFNHPKGRDNIIDDFLYCFQYLNAIQTHCPHILRYLITAVITNKDVRKRQWLKDLVKVIQOESYTYKDPITEFVQCLYVDFDFGACKLRECE : 318
Drosophila : TWLIHUSLVVFFNHPKGRDLIDDFLYCFQYLNAIQTHCPHIMRYLITAVITNK---TRRNALKDLIKVIQOESYTYRDPITEFLECLYVDFDFGARLKLHECOT : 311
Xenopus : TWLIHUSLVVFFNHPKGRDNIIDDFLYCFQYLNAIQTHCPHILRYLITAVITNKDVRKRQWLKDLVKVIQOESYTYKDPITEFVQCLYVDFDFGACKLRECE : 318

aplysia : VLVNDFFLVACLEDFIENARLIDFETFCRIHQCSISMLADKLNMTPEEAERUIVNLIRNARLDAKIDSKLGHVVMGCTQVSPYQQVIEKTKSLRFRSONLAMNIE : 422
human   : VLVNDFFLVACLEDFIENARLIDFETFCRIHQCSISMLADKLNMTPEEAERUIVNLIRNARLDAKIDSKLGHVVMGCTQVSPYQQVIEKTKSLRFRSONLAMNIE : 423
Zebra   : VLVNDFFLVACLEDFIENARLIDFETFCRIHQCSISMLADKLNMTPEEAERUIVNLIRNARLDAKIDSKLGHVVMGCTQVSPYQQVIEKTKSLRFRSONLAMNIE : 424
Drosophila : VILNDFPFLVACLEDFIENARLIDFETFCRIHQCSISMLADKLNMTPEEAERUIVNLIRNARLNAKIDSKLGHVVMGCTQVSPYQQVIEKTKSLRFRSONLAMNIE : 417
Xenopus : VLVNDFFLVACLEDFIENARLIDFETFCRIHQCSISMLADKLNMTPEEAERUIVNLIRNARLDAKIDSKLGHVVMGCTQVSPYQQVIEKTKSLRFRSONLAMNIE : 424

aplysia : KKLGNRS-NL-DNQCUSQ----- : 438
human   : KKLQNRSSE-APNQAATDSGFY : 445
Zebra   : KKQSNANRNE-TPNQAADAGFY : 446
Drosophila : RKSQKQNCESADSUKYY----- : 435
Xenopus : KRMNTNERTL-APTQAADDSGFY : 446

```

Fig. S1. Predicted amino acid sequence alignments of Ap-eIF3e with eIF3e from other species (human, NP\_001559; *Xenopus*, AAF80474; Zebrafish, NP\_957133; *Drosophila*, NP\_477385). The conserved PCI domain was marked by line above the sequences.

**Table S1. Summary of *Aplysia kurodai* EST clones**

|                              |       |
|------------------------------|-------|
| Total sequences              | 11755 |
| Full-length enriched library | 5190  |
| 5'-enriched library          | 1675  |
| Random-primed library        | 3386  |
| 5-HT-treated library         | 750   |
| Buccal muscle library        | 754   |
| Total high-quality sequences | 11493 |

**Table S2. GO classification of unique transcripts: Biological processes**

| Gene ontology term                     | Number of putative genes |
|----------------------------------------|--------------------------|
| Total                                  | 1052                     |
| Cell communication                     | 189                      |
| Cell adhesion                          | 22                       |
| Cell-cell signaling                    | 8                        |
| Transmission of nerve impulse          | 9                        |
| Response to external stimulus          | 32                       |
| Perception of external stimulus        | 15                       |
| Response to biotic stimulus            | 15                       |
| Signal transduction                    | 83                       |
| Cell growth and/or maintenance         | 803                      |
| Cell cycle                             | 31                       |
| Cell growth                            | 15                       |
| Cell motility                          | 15                       |
| Cell organization and biogenesis       | 60                       |
| Cell proliferation                     | 3                        |
| Metabolism                             | 565                      |
| Regulation of cell shape and cell size | 6                        |
| Transport                              | 94                       |
| Death                                  | 7                        |
| Development                            | 29                       |
| Organogenesis                          | 10                       |
| Gametogenesis                          | 4                        |
| Obsolete                               | 10                       |
| Embryogenesis and morphogenesis        | 6                        |
| Histogenesis and organogenesis         | 4                        |
| Physiological processes                | 14                       |

Hierarchical classification was performed and children terms are indented.

**Table S3. GO classification of unique transcripts: Molecular functions**

| Gene ontology term                     | Number of putative genes |
|----------------------------------------|--------------------------|
| Total                                  | 1015                     |
| Binding                                | 462                      |
| Neurotransmitter receptor              | 5                        |
| Nucleic acid binding                   | 234                      |
| DNA binding                            | 65                       |
| Nuclease                               | 4                        |
| RNA binding                            | 119                      |
| Translation factor                     | 25                       |
| Nucleotide binding                     | 65                       |
| Protein binding                        | 70                       |
| Receptor binding                       | 12                       |
| Sterol carrier                         | 5                        |
| Cell adhesion molecule                 | 5                        |
| Chaperone                              | 23                       |
| Defense/immunity protein               | 5                        |
| Enzyme                                 | 314                      |
| Hydrolase                              | 95                       |
| Omerase                                | 11                       |
| cis-trans isomerase                    | 4                        |
| Kinase                                 | 35                       |
| Ligase                                 | 21                       |
| Lyase                                  | 16                       |
| Oxidoreductase                         | 72                       |
| Transferase                            | 45                       |
| Enzyme activator                       | 11                       |
| Enzyme inhibitor                       | 16                       |
| Motor                                  | 7                        |
| Protein degradation tagging            | 4                        |
| Signal transducer                      | 30                       |
| Receptor                               | 15                       |
| Receptor signaling protein             | 8                        |
| Structural molecule                    | 81                       |
| Structural constituent of cytoskeleton | 25                       |
| Structural constituent of muscle       | 11                       |
| Structural constituent of ribosome     | 29                       |
| Transporter                            | 84                       |

Hierarchical classification was performed and children terms are indented.

**Table S4. Differentially expressed clones by > 2-fold 2 h after 5-HT treatment in microarray**

| EST name                     | BLASTX result*                                                              | GenBank accession number | Ratio of medians (5-HT/control) | Sense primer sequence  | Antisense primer sequence | Short description of real-time PCR results† |
|------------------------------|-----------------------------------------------------------------------------|--------------------------|---------------------------------|------------------------|---------------------------|---------------------------------------------|
| <b>Up-regulated clones</b>   |                                                                             |                          |                                 |                        |                           |                                             |
| 5CAP092402_H04_760           | Matrilin (AAN61407, 1.00E-33)                                               | EY418286                 | 5.377                           | ATCACCTCCACCACACCTC    | AGCCACATCATTATCGTCA       | Significant                                 |
| 5CAP090501-pMES_D10_142      | Antistatin precursor (P38977, 2.00E-25)                                     | EY417467                 | 4.830                           | AGCATGGAACGCTTGGAC     | AGAGCGAGGTTTGATTAC        | Significant                                 |
| 5CAP031402_pMES_B12_1600     | Cathepsin L-like cysteine proteinase precursor (AAQ22984, 5.00E-05)         | EY417083                 | 4.419                           | GAGACCAAGTGGACGAGGA    | CTTGAGCGCTTGTGTGGTA       | No change                                   |
| 5HTCNS062702-T3_D01_92       | No hits                                                                     | EY416228                 | 3.582                           |                        |                           |                                             |
| R5CAP031403_pMES_E11_756     | No hits                                                                     | EY394288                 | 3.306                           |                        |                           |                                             |
| 5CAP090504-pMES_E03_435      | Alpha tubulin 2 (AAM09674, 6.00E-48)                                        | EY417749                 | 2.984                           | CTCTCATCTCACGACGGACA   | ATACCGTGCTCCAGGCAGTA      | No change                                   |
| 5CAP090501-pMES_H12_192      | No hits                                                                     | EY417516                 | 2.942                           |                        |                           |                                             |
| 5CAP092402_B10_694           | LOC443610 protein (AAI28922, 7.00E-55)                                      | EY418226                 | 2.838                           | TACGCCGCCTATCCTTTATG   | TACAGCCCTTGATCCCACTC      | No change                                   |
| C/EBP                        | ApC/EBP (AAA18286, 0)                                                       |                          | 2.594                           | TACTCTCAACCTTCCCTCAAGC | TGACAAATGAACAAAATGGACA    | Significant                                 |
| 5CAP031402_pMES_D12_1621     | ApCREB2 (AAA92437, 1.00E-25)                                                | EY417103                 | 2.548                           | AGCGTTTCTCTCCATACTCT   | TGCAAGTCATCGACCTTAGTCT    | No change                                   |
| 5CAP031402_pMES_B04_1592     | No hits                                                                     | EY417075                 | 2.478                           |                        |                           |                                             |
| 5HTCNS122105-T3-C10-628      | Eukaryotic translation initiation factor 3, subunit 6 (NP_001559, 5.00E-73) | EY416763                 | 2.436                           | CGAGACATACGCCAGTGTGA   | GCGATAGGCGAAAGAAACAG      | Significant                                 |
| 5CAP092404_G12_948           | No hits                                                                     | EY418453                 | 2.379                           |                        |                           |                                             |
| 5CAP090501-pMES_F08_164      | hypothetical protein (XP_001176996, 6.00E-33)                               | EY417489                 | 2.230                           | CTGGGCCATATTTTACACCC   | GAGGCTTCACTCTTGGAAC       | No change                                   |
| YesTrp090505-Bco3_05_B06_498 | No hits                                                                     | EY422272                 | 2.173                           |                        |                           |                                             |
| YesTrp090503-Bco3_03_D10_334 | No hits                                                                     |                          | 2.085                           |                        |                           |                                             |
| YesTrp090503-Bco3_03_B08_308 | No hits                                                                     | EY422122                 | 2.071                           |                        |                           |                                             |
| <b>Down-regulated clones</b> |                                                                             |                          |                                 |                        |                           |                                             |
| 5CAP101001_F09_1029          | Kazal proteinase inhibitor (ABL74453, 2.00E-22)                             | EY418526                 | 0.346                           | GGAAGCTGTGGTATGGACT    | CGGGAAGAGTGAAGGTCTTG      | No change                                   |
| 5CAP120302-pMES_C06_1166     | unnamed protein product (CAG08644, 2.00E-14)                                | EY419713                 | 0.356                           | ATTTTTGCCTCCAACCTGTG   | TCTGTGGACGAATTCAAGA       | Reverse trend                               |
| 5CAP031401_pMES_A06_1493     | No hits                                                                     | EY416984                 | 0.384                           |                        |                           |                                             |
| 5CAP092402_D03_711           | No hits                                                                     | EY418242                 | 0.387                           |                        |                           |                                             |
| 5CAP120601_pMES_E03_2269     | No hits                                                                     | EY420078                 | 0.393                           |                        |                           |                                             |
| 5CAP031403_pMES_B09_1682     | No hits                                                                     | EY417156                 | 0.409                           |                        |                           |                                             |
| 5CAP092401_E01_625           | No hits                                                                     | EY418164                 | 0.443                           |                        |                           |                                             |
| 5CAP031405_pMES_G09_1891     | hCG1999844 (EAX04582, 0.013)                                                | EY417337                 | 0.460                           | TGCATTTATTTCCCTCA      | CATGCTTGGCATGAAAAAGA      | No change                                   |
| 5CAP101001_G01_1033          | No hits                                                                     | EY418530                 | 0.479                           |                        |                           |                                             |
| 5CAP101001_H07_1051          | BAT1 homolog (AAQ13472, 2.00E-26)                                           | EY418548                 | 0.486                           | GCCGGAGAACTCTGACACAT   | CGACCCTCGATGTAAGAGGA      | Significant                                 |

\*BLASTX results are described as: gene description (accession number of BLASTX matched gene, E-value).

†Significant means  $P < 0.05$  by student's  $t$  test; trend or reverse trend means  $0.05 < P \leq 0.10$  by student's  $t$  test; no change means  $P > 0.10$ .
